# Supplementary material
Source: PubMed Central journal article supplement (PMC65034)
Supplement: pnas_98_26_15360__1.pdf [file pnas_98_26_15360__1.pdf]

**Table 2. Properties of the cDNAs characterized in this study**

| <b>Properties</b>              | <b>AtDFA</b>           | <b>AtDFB</b>  | <b>AtDFC</b>           | <b>AtDFD</b>  |
|--------------------------------|------------------------|---------------|------------------------|---------------|
| <b>GenBank accession no.</b>   | AJ250872               | AJ250873      | AJ271786               | AJ292545      |
| <b>cDNA, bp</b>                | 1725                   | 1830          | 2336                   | 1616          |
| <b>ORF: residues</b>           | 530                    | 571           | 625                    | 492           |
| <b>kDa</b>                     | 56.8                   | 63.3          | 68.9                   | 55.1          |
| <b><i>Arabidopsis</i> ESTs</b> | AV441280/AV532931 (3') | AV526762 (5') | AV521153/AV527830 (3') | BE039115 (5') |
| (location of the match)        | AV442646 (5')          | AV520446 (3') |                        |               |
| <b>Gene sequence</b>           | AB006707               | AB071060      | ATAC009400/ATAC010927  | ATF1I16       |
| <b>Chromosome location</b>     | V                      | V             | III                    | III           |
| <b>Cell localization*</b>      |                        |               |                        |               |
| Mitochondrial score            | 0.36/0.66              | 0.79/0.64     | 0.98/0.46              | 0.00/0.14     |
| Plastid score                  | 0.34/0.41              | 0.02/0.12     | 0.04/0.18              | 0.11/0.05     |

\*The prediction software PREDOTAR (<http://www.inra.fr/Internet/produits/Predotar>) and TARGETP [Emanuelsson, O., Nielsen, H., Brunak, S. & von Heijne, G. (2000) *J. Mol. Biol.* **300**, 1005–1016] were used to identify putative mitochondrial and plastid targeting sequences. Scores (PREDOTAR/TARGETP) were obtained by using default cutoffs.
