# Supplementary material
Source: PubMed Central journal article supplement (PMC65034)
Supplement: pnas_98_26_15360__3.pdf [file pnas_98_26_15360__3.pdf]

10 20 30 40 50 60 70 80 90  
AtDFA-----MRTLWNHFSTNSYIKISPRMRRISAANLISNRNLSTISSSTEDPELRDFVGF  
AtDFB-----MFAVSIVPRTTSCRLSSAFLCQLSIPPLTLRLHHHYQHHQPHLPSPLSFQIHSLRKQIDMAAQQGDSYEEALAAL  
AtDFC MLVCGKGFLLKCRAPGVPPFFCDKRKSFFTKTKRGFHSLLPLGTGVRVYFNNNLRYSSNSIEVVEKAAINMGSKEDKADNPALSSYDDAMEAL  
AtDFD-----MATEDDGELSARYQNTLDAL

ESLKNYEKSGVPGAGTSDSDGFDLGRMKRLMLRLRNPHYKYKVVHVAGTKGKGSTSAFLSNILRAGGYSVGCYSSPHILSIKERISCNPEPVSASTLND  
SSLITKRSRAD----KSNKGDREFELVFDYLKLLDLEEDILKMNVIHVAGTKGKGSTCTFTESIIRNYGFRTGLFTSPHLIDVRERFRLDGVDISEEKFLG  
STLISRNRNGDRTPTKGNR-DKLEQVVTYLKILDLEDKIKELKVIHVAGTKGKGSTCVFSEAILRNCGFRTGMFTSPHLIDVRERFRIDGLDISEEKFLQ  
SSLITKRGRLASN---NQSHRFRLLFHYLKVLELEDAVSQMKIIHVAGTKGKGSTCTFAESILRCYGLRTGLFTSPHLIDVRERFRNLNGIEISQEKFVN

LFYSVKPILEQSIQEENGSLSHFEILTGIASFSEKENVDIIVIEAGLGGARDATNVISSNLAASVITTIIEEHMAALGGSLESTAEAKSGIIKHGRPV  
YFWWCYNRLKERTNEEIPMPYFRFLALLAFKIFAAEEVDAAILEVGLGGKFDATNAVH--KPVVCGISSLGYDHMEILGDTLTKIAGEKAGIFKLGVPA  
YFWECKWLLKEKAVDGLTMPPLFQFLTIVLAFKIFVCEKVDVAVIEVGLGGKLDSTNVIQ--KPVVCGIASLGMMDHMDILGNTLADIAFHKAGIFKQIPA  
YFWCCFHKLKEKTSNEVPMPYFCFLALLAFKIFTTEQVDVIVILEVGLGGRFDATNVIQ--KPVVCGISSLGYDHMEILGYTLAEIAAEKAGIFKSGVPA

VLGGPFLPHIEGILRSKAASVSSSVILASNIGSSSSIKGIINKNGIGLCQSCDIVIQNEKDDQPIVELSDVNLRLMLGHHLQONAVTATCVSLC---LRDQ  
FT-VPQPDEAMRVLEEKAS-----ETEVLNLEVVOPLTARL-----LSGQKGLDGEHQYVNAGLA--VSLASIWLQQI  
FT-VPQLSEAMDVLQKTAN-----NLEVPLEVVAPLEPKK-----LDGVTGLSGDHQLVNAGLA--VSLSRCWLQRT  
FT-VAQPDEAMRVLNEKAS-----KLEVNLOVVEPLD-----SSQRLGLQGEHQYLNAGLA--VALCSTFLKEI

G-----CGRVTDEAIRIGLENTRLILGRSQFLTPKKAET-----LLL-PGATVLLDGAHTKESARA-----  
G--KLEVPSRTQMSILPEKFIKGLATASLQGRAQVVPDQYTE-----SRTSGDLVFLYLDGAHSPESMEACAKWFSVAVKGDNQS GSSGHLVNGSA--  
GNWKKIFPNESKETEIPVAFCRGLATARLHGRAQVVHVDVSDPDSSDSMETPCGDLIFYL DGAHSPQSM EACGRWFSSAVRG---DKSLSTAVNGYMRH  
G--IEDKNGLDQTNGLPEKFISGLSNAYLMGRAMIVPD-----SELPEEIVYLDGAHSPESMEACAIWFSKQIKQ-NQER-----N-----

-----LK--EMIKKDFPEKRLVFVAMASDKDHVSFAKELLSGLKPEAVILTEADIG-----G GKIRSTESSALKES-----  
---GSSHDKWSNETCEQILLFNCMSVRDPNLLPHLKNMCAKYGVNFKKALFVPMNSVYHKVGTAA DLPE-NDPQVDLSWQFTLQKVVESLVQS-----  
GEYGTDLNRVS---KQILLFNCMEVRDPQVLLPKLVTTTCASSDTHFSRALFVPSMSTYNKVIISGASAI PSDTRRKDLTWQFRLQRLWEKSIQGT DAGLD  
-----QKRS---EQILLFNCMSVRDPSSLPLRLRSKCIDQGVDFKRAVFPVNSVYNQVGSSTNVG---TRVESMSWQFGLQRIWESLAR-----

-----WIKAADELGSRSM EASENKTVLGSILKAYKILSD--DTTSSDSGMVIVTGS LHLVSSV LASLQH  
-----ERDGEKDGESDG-----NSEVFTSLPMAIKCLRDTVH ESSATRFQVLVTGSLHVLGDVLRLLRK  
HTLKP DGITALPPHDFLCGDAPQCGGPAGTPV-TSSAVMPSLPLTINWLRDCVRRNPS-LKLEVLVTGSLHVLGDVLRLLKR  
-----GEAKSNSKSDSKGKEE-EKSFVFS SLPVAVDWLRDNARQSK-QVRFQVLVTGSLHVLGDLLRFIKK
